# Supplementary material for: Kidney-type glutaminase (GLS1) is a biomarker for pathologic diagnosis and prognosis of hepatocellular carcinoma
Source: PubMed Central journal article supplement (PMC4480704; doi:10.18632/oncotarget.3196), 2015-03-26
Supplement: oncotarget-06-7619-s001.pdf [file oncotarget-06-7619-s001.pdf]

## SUPPLEMENTARY FIGURES AND TABLES

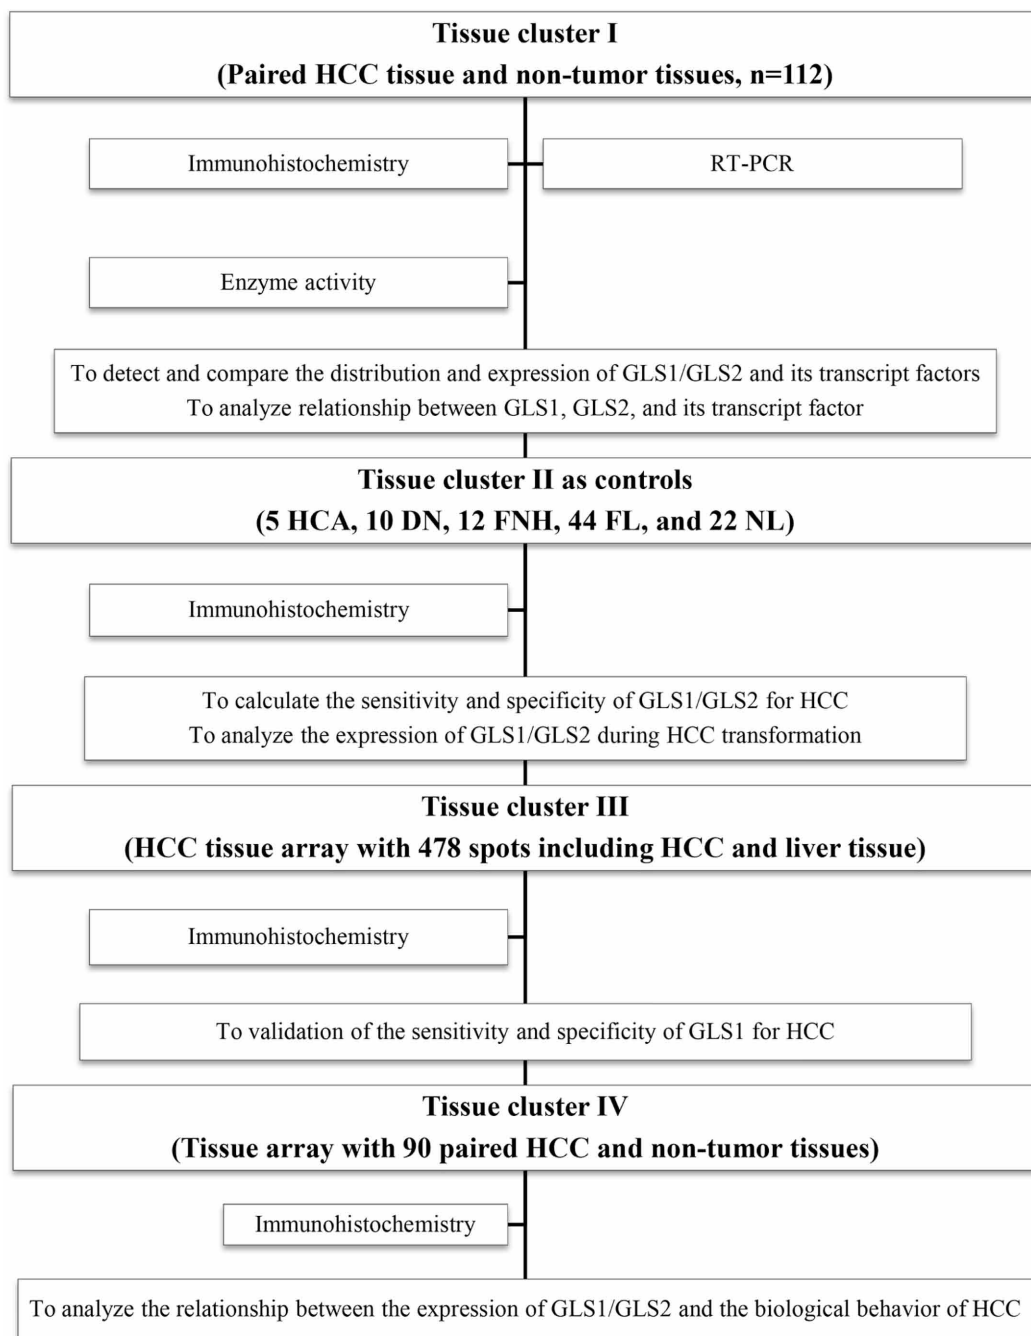

**Supplementary Figure 1: Flow chart summarizing the tested samples.** Firstly, the expression and biodistribution of GLS1/GLS2 in tumor tissue (TT) was compared with the adjacent non-tumor tissue (NT), and the relationship between GLS1/GLS2 and its transcript factor was analyzed in the tissue cluster I, 112 paired TT and NT obtained from HCC patients. Secondly, the sensitivity and specificity of GLS1 for diagnosis of HCC was evaluated, and HCC oncogenic transformation was analyzed in tissue cluster II, including 5 hepatocellular adenoma (HCA), 10 dysplastic nodules (DN), 12 focal nodular hyperplasia (FNH), 44 fibrotic liver (FL), and 22 normal liver (NL). Thirdly, the sensitivity and specificity of GLS1 was validated for HCC diagnosis in tissue cluster III with tissue array, including the paired tumor tissues and non-tumor tissues from 221 patients with HCC, and other tissues from healthy subjects to other liver diseases. Fourthly, the relationship between the expression of GLS1/GLS2 and the biological behavior of HCC was analyzed in tissue cluster IV with tissue array, including 90 paired tumor tissues (TT) and adjacent non-tumor tissues (NT).

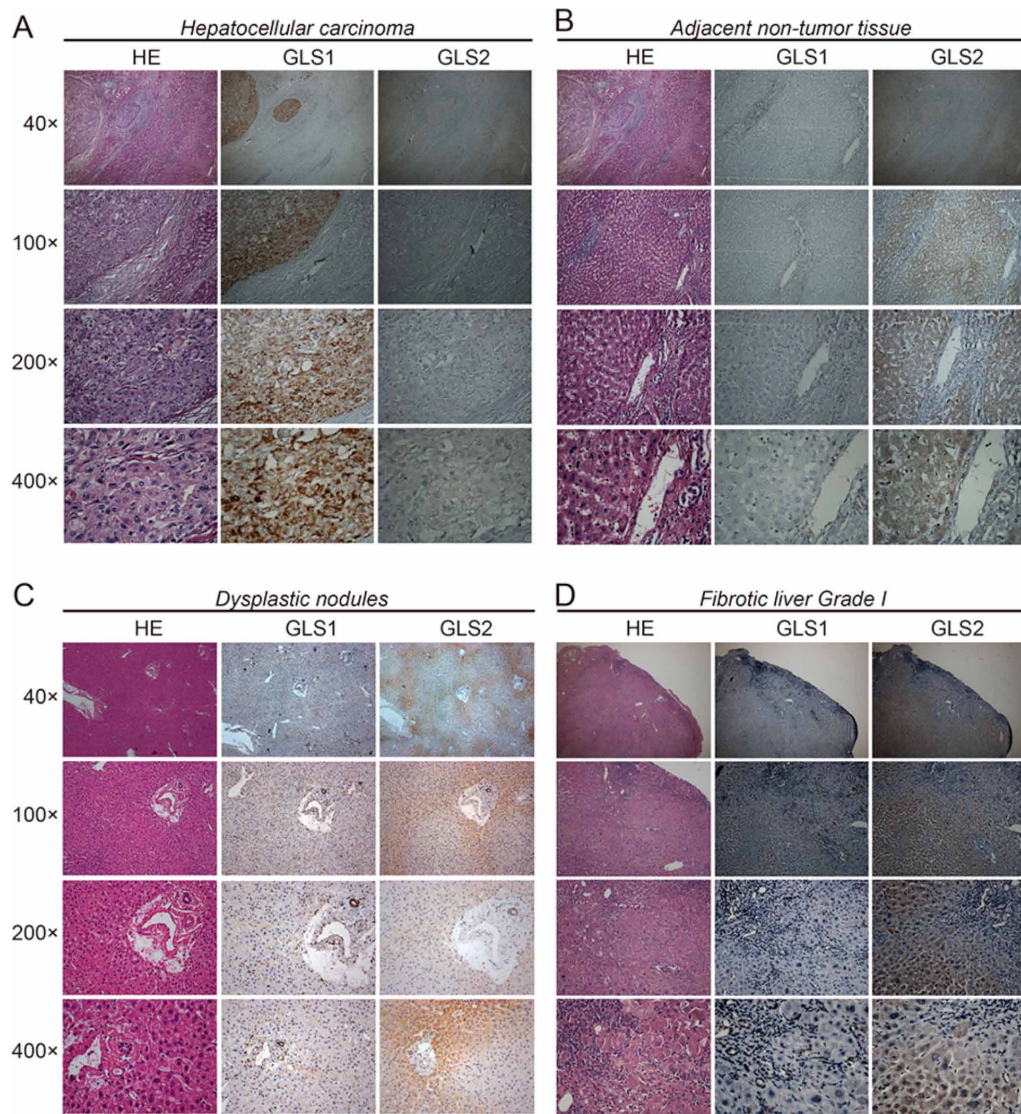

**Supplementary Figure 2: Histological features and immunostaining of GLS1 and GLS2 in different type of liver diseases.** The expression and distribution of GLS1/GLS2 were detected in a serial of liver diseases, including HCC (A) and the paired adjacent non-tumor tissue (B), DN (C), fibrotic liver from Grade I to IV (D–G).

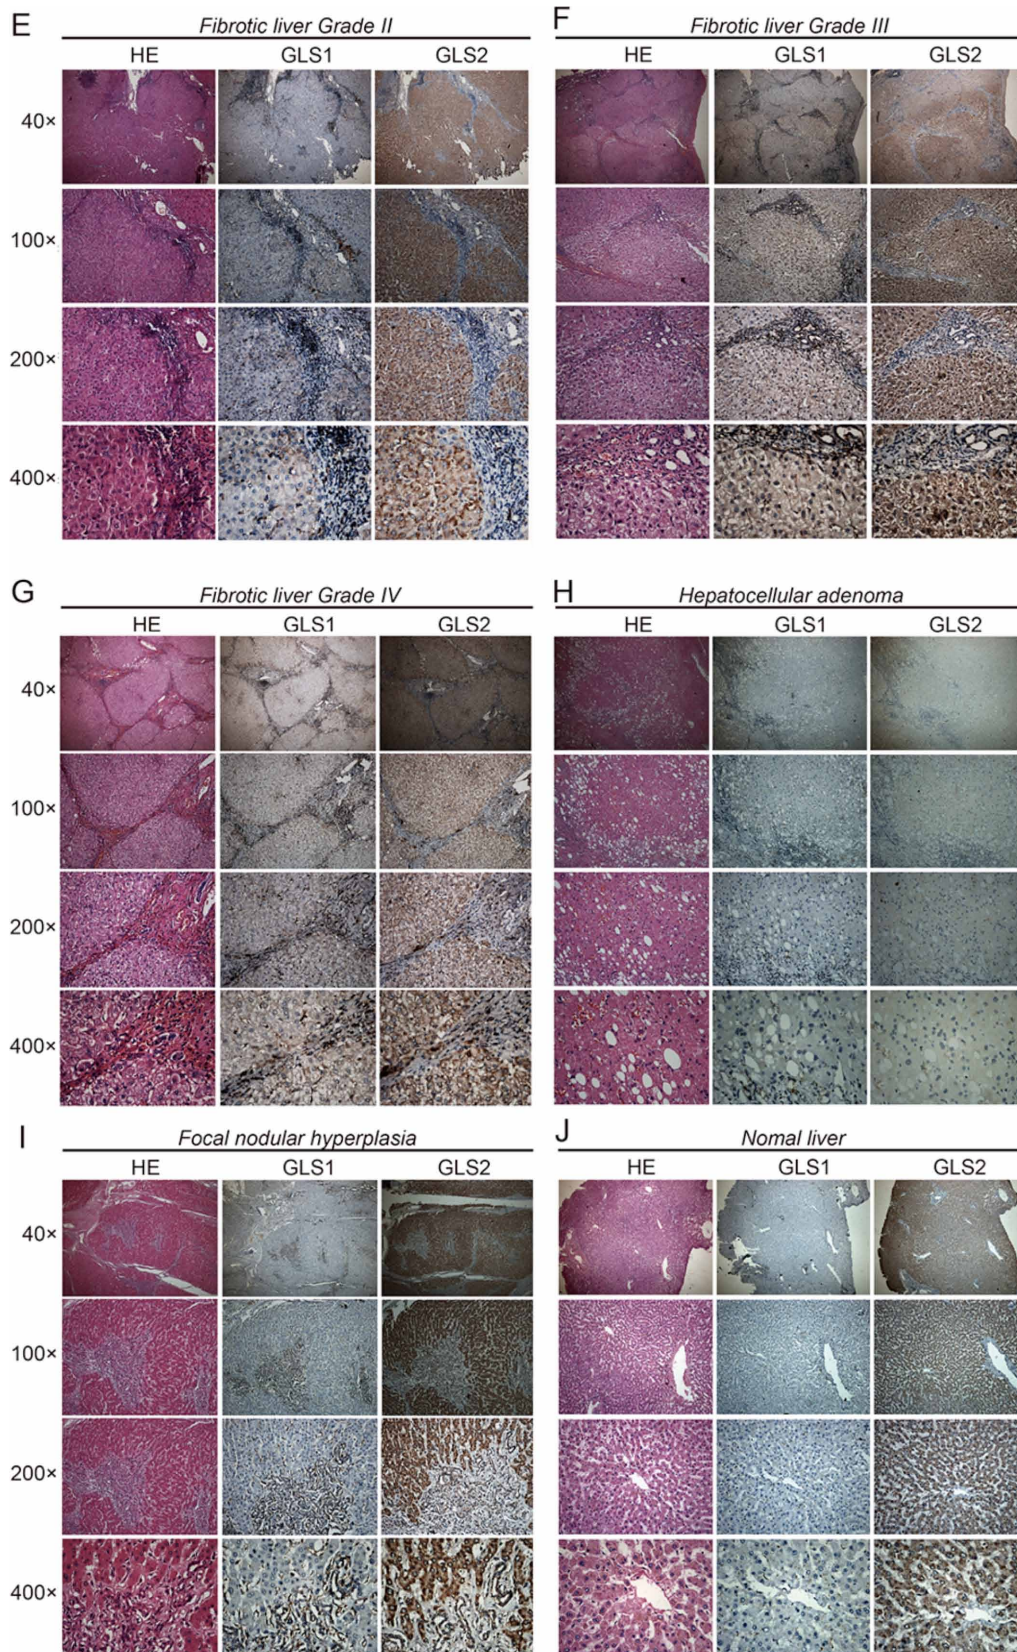

**Supplementary Figure 2: (Continued) Histological features and immunostaining of GLS1 and GLS2 in different type of liver diseases. (D–G), HCA (H), FNH (I), normal liver (J)** The representative staining of GLS1 and GLS2, and their corresponding hematoxylin and eosin (HE) staining are shown at magnifications as indicated.

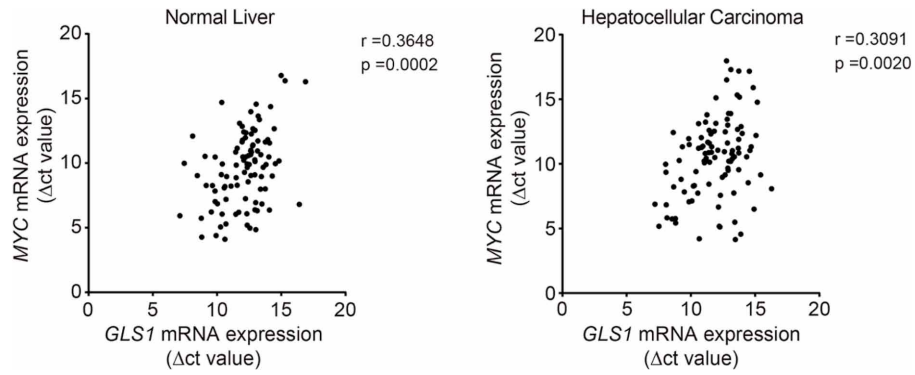

**Supplementary Figure 3: Correlation of expression of GLS1 and MYC.** Expressive associations between *GLS1* mRNA and *MYC* mRNA in normal liver (NL, left panel) or HCC (right panel) were evaluated using nonparametric Spearman's rank correlation analysis ( $r = 0.3648$ ,  $p = 0.0002$ ;  $r = 0.3091$ ,  $p = 0.0020$ ).

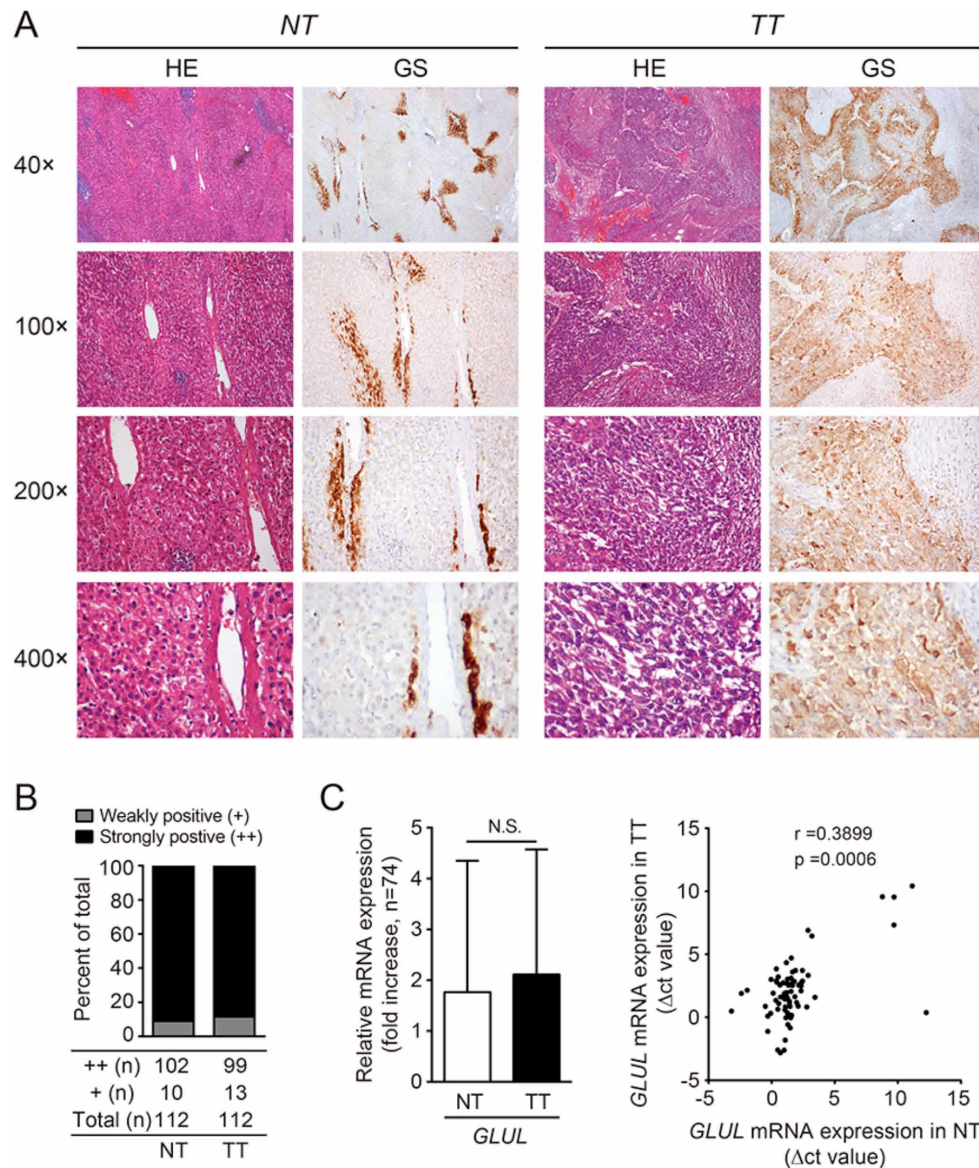

**Supplementary Figure 4: Distribution and expression of GS in HCC and paired adjacent non-tumor tissue.** (A) The expression intensity and distribution of GS antigen were detected by immunohistochemical staining in 112 paired HCC (TT) and their paired non-tumor tissues (NT). The representative staining of GS and their corresponding hematoxylin and eosin (HE) staining are shown. Magnifications are depicted. (B) The expression and intensity of total samples were evaluated and classified into three grades, ++ indicates strongly positive, + weakly positive and – negative. (C) The expression of *GLUL* gene, which encodes GS antigen, in HCC (TT) and paired adjacent non-tumor tissue (NT) was detected by RT-PCR (left panel, N.S.  $p > 0.05$ ). *GLUL* mRNA expressive associations between TT and NT were evaluated using nonparametric Spearman's rank correlation analysis (right panel,  $r = 0.3899$ ,  $p = 0.0006$ ).

**Supplementary Table 1: Clinical features of 112 HCC patients based on GLS1 and GLS2 expression**

|                                        | Class    | GLS1     |          |          | GLS2     |          |          |
|----------------------------------------|----------|----------|----------|----------|----------|----------|----------|
|                                        |          | Negative | Positive | <i>p</i> | Negative | Positive | <i>p</i> |
| Age(years)                             | Mean     | 55.69    | 52.00    |          | 53.37    | 52.26    |          |
|                                        | SD       | 11.96    | 9.40     | 0.1636   | 10.52    | 9.71     | 0.4431   |
| WBC (10 <sup>9</sup> /L)               | Negative | 7.40     | 8.12     |          | 7.69     | 8.24     |          |
|                                        | Positive | 3.43     | 3.16     | 0.504    | 3.33     | 3.11     | 0.4632   |
| Plt (10 <sup>9</sup> /L)               | Negative | 148.06   | 141.28   |          | 141.19   | 146.50   |          |
|                                        | Positive | 61.31    | 69.72    | 0.5041   | 72.44    | 58.71    | 0.5279   |
| PT (s)                                 | Negative | 12.77    | 13.37    |          | 13.14    | 13.24    |          |
|                                        | Positive | 1.00     | 2.45     | 0.6215   | 2.35     | 1.77     | 0.8929   |
| Alb (μmol/L)                           | Negative | 35.69    | 35.14    |          | 35.63    | 34.83    |          |
|                                        | Positive | 4.53     | 4.28     | 0.602    | 4.81     | 3.52     | 0.589    |
| TBil (μmol/L)                          | Negative | 16.64    | 20.88    |          | 20.46    | 18.34    |          |
|                                        | Positive | 5.33     | 11.91    | 0.2634   | 10.95    | 9.93     | 0.2917   |
| Glu (μmol/L)                           | Negative | 5.79     | 5.89     |          | 5.47     | 6.37     |          |
|                                        | Positive | 1.81     | 1.73     | 0.8955   | 1.03     | 2.30     | 0.3274   |
| AFP (ng/mL)                            | Negative | 799.45   | 1100.70  |          | 780.01   | 1402.00  |          |
|                                        | Positive | 2504.70  | 2920.50  | 0.2563   | 2475.30  | 3273.10  | 0.3638   |
| Length (cm)                            | Negative | 5.40     | 5.74     |          | 5.87     | 5.30     |          |
|                                        | Positive | 3.33     | 3.29     | 0.5886   | 3.27     | 3.32     | 0.3298   |
| Volume <sup>#</sup> (cm <sup>3</sup> ) | Negative | 154.99   | 154.32   |          | 195.07   | 89.56    |          |
|                                        | Positive | 297.86   | 296.90   | 0.607    | 352.04   | 153.92   | 0.1568   |
| Gender                                 | Female   | 6        | 12       |          | 10       | 8        |          |
|                                        | Male     | 23       | 71       | 0.557    | 60       | 34       | 0.5974   |
| Diabetes                               | No       | 27       | 77       |          | 68       | 36       |          |
|                                        | Yes      | 2        | 6        | 1        | 2        | 6        | 0.0507   |
| Hepatitis                              | No       | 9        | 23       |          | 19       | 13       |          |
|                                        | Yes      | 20       | 60       | 0.8123   | 51       | 29       | 0.6719   |
| Cirrhosis                              | No       | 4        | 4        |          | 6        | 2        |          |
|                                        | Yes      | 21       | 63       | 0.2061   | 52       | 32       | 0.7054   |
| Necrosis                               | No       | 21       | 54       |          | 45       | 30       |          |
|                                        | Yes      | 6        | 17       | 1        | 14       | 9        | 1        |
| Differentiation                        | 1        | 3        | 23       |          | 11       | 4        |          |
|                                        | 2        | 22       | 58       |          | 46       | 34       |          |
|                                        | 3        | 0        | 7        | 0.3054   | 4        | 3        | 0.5707   |
| Tumor number                           | 1        | 23       | 63       |          | 52       | 34       |          |
|                                        | 2        | 2        | 7        |          | 7        | 2        |          |
|                                        | 3        | 4        | 12       | 1        | 10       | 6        | 0.6875   |

(continued)

| Class                 |      | GLS1     |          |          | GLS2     |          |          |
|-----------------------|------|----------|----------|----------|----------|----------|----------|
|                       |      | Negative | Positive | <i>p</i> | Negative | Positive | <i>p</i> |
| Tumor capsule invaded | No   | 15       | 24       |          | 24       | 15       |          |
|                       | Yes  | 14       | 56       | 0.0439   | 46       | 27       | 1        |
| Never invaded         | No   | 24       | 69       |          | 61       | 32       |          |
|                       | Yes  | 0        | 2        | 1        | 0        | 2        | 0.1256   |
| Micro-vessel invaded  | No   | 18       | 46       |          | 40       | 24       |          |
|                       | Yes  | 11       | 35       | 0.6663   | 28       | 18       | 1        |
| Recurrence            | No   | 16       | 54       |          | 40       | 31       |          |
|                       | Yes  | 16       | 25       | 0.2479   | 27       | 14       | 0.5958   |
| Stage                 | I    | 10       | 26       |          | 23       | 13       |          |
|                       | II   | 11       | 26       |          | 20       | 17       |          |
|                       | IIIA | 5        | 21       |          | 15       | 11       |          |
|                       | IIIB | 1        | 1        |          | 2        | 0        |          |
|                       | IVA  | 2        | 6        |          | 7        | 1        |          |
|                       | IVB  | 0        | 2        | 0.8205   | 2        | 0        | 0.3903   |

WBC, white blood cell; Plt, platelet; PT, prothrombin time; Alb, Albumin; TBil, Total bilirubin; Glu, Glucose; AFP, alpha fetal protein. #Tumor volume = length<sup>2</sup> \* width/3.

**Supplementary Table 2: Correlation between GLS1, GLS2, and clinical index**

| Index                   | Category                | GLS1 in TT |          |                | GLS2 in TT |          |                |
|-------------------------|-------------------------|------------|----------|----------------|------------|----------|----------------|
|                         |                         | Negative   | Positive | <i>P</i> value | Negative   | Positive | <i>P</i> value |
| GLS1/2 in NT            | Negative                | 6          | 24       |                | 2          | 3        |                |
|                         | Weak                    | 9          | 39       |                | 4          | 1        |                |
|                         | Strong                  | 3          | 9        | 0.021          | 22         | 42       | 0.0380         |
| Gender                  | Female                  | 3          | 10       |                | 6          | 6        |                |
|                         | Male                    | 15         | 62       | 0.719          | 24         | 56       | 0.236          |
| Grade                   | High                    | 2          | 1        |                | 1          | 1        |                |
|                         | Medium                  | 13         | 38       |                | 15         | 35       |                |
|                         | Low                     | 3          | 33       | 0.020          | 14         | 19       | 0.521          |
| Tumor number            | Single                  | 15         | 67       |                | 25         | 53       |                |
|                         | Multiple                | 3          | 5        | 0.195          | 5          | 3        | 0.121          |
| T Stage                 | I                       | 3          | 8        |                | 5          | 5        |                |
|                         | II                      | 8          | 25       |                | 7          | 25       |                |
|                         | III                     | 7          | 35       |                | 16         | 24       |                |
|                         | IV                      | 0          | 3        | 0.710          | 1          | 2        | 0.233          |
| Lymph node              | Negative                | 17         | 67       |                | 29         | 51       |                |
|                         | Positive                | 0          | 1        | 1              | 0          | 1        | 1              |
| Extrahepatic metastasis | No                      | 18         | 69       |                | 29         | 54       |                |
|                         | Yes                     | 0          | 1        | 1              | 0          | 1        | 1              |
| Stage                   | 1                       | 3          | 8        |                | 5          | 5        |                |
|                         | 2                       | 8          | 25       |                | 7          | 25       |                |
|                         | 3                       | 7          | 36       |                | 17         | 24       |                |
|                         | 4                       | 0          | 2        | 0.706          | 0          | 2        | 0.138          |
| Survival time           | Mean (months)           | 44.56      | 29.32    |                | 24.37      | 24.73    |                |
|                         | SD                      | 22.98      | 23.84    | 0.018          | 35.60      | 23.29    | 0.049          |
| Age                     | Mean (years)            | 59.28      | 53.63    |                | 52.47      | 7.99     |                |
|                         | SD                      | 10.42      | 8.03     | 0.014          | 55.86      | 8.86     | 0.084          |
| Length                  | Mean (cm)               | 6.11       | 7.65     |                | 6.81       | 4.28     |                |
|                         | SD                      | 4.16       | 5.35     | 0.259          | 7.68       | 5.59     | 0.466          |
| Volume                  | Mean (cm <sup>3</sup> ) | 92.10      | 134.21   |                | 91.40      | 132.13   |                |
|                         | SD                      | 148.55     | 249.61   | 0.496          | 146.43     | 274.64   | 0.312          |

Stage the 7th AJCC.
